# Supplementary material
Source: Springer Nature journal article supplement (https://www.springermedizin.de/resource/supplementary/12963_2011_157_MOESM6_ESM.pdf/9572778)

**Stillbirth**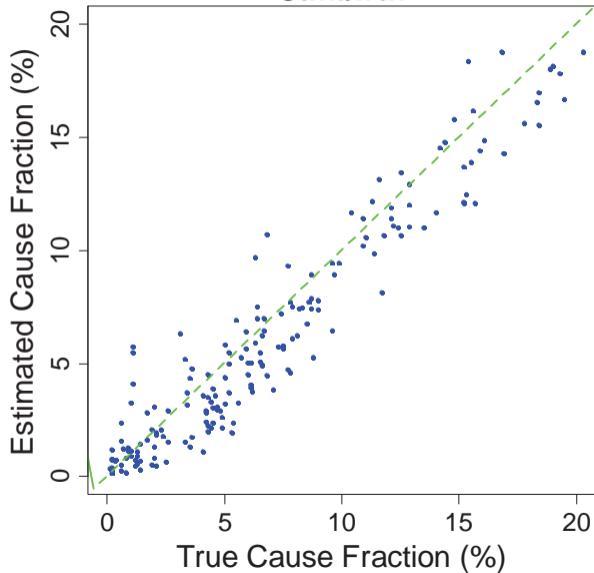**Pneumonia**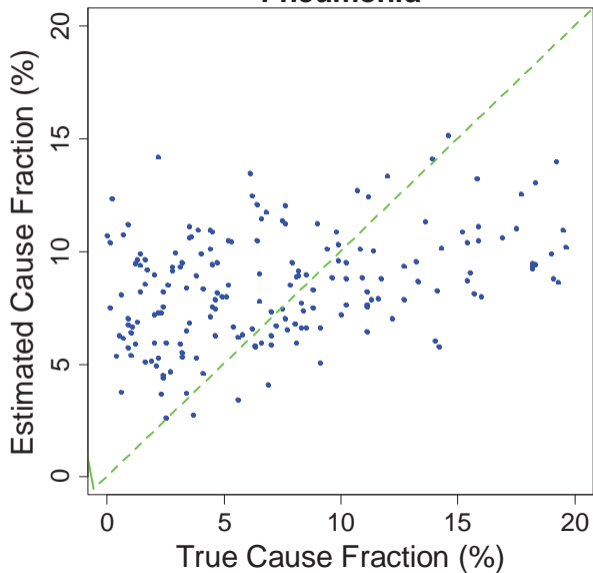

Supplement: MOESM6 [file 9572778]
